# Supplementary material for: Effect of weight loss, with or without exercise, on body composition and sex hormones in postmenopausal women: the SHAPE-2 trial
Source: PubMed Central journal article supplement (PMC4557857; doi:10.1186/s13058-015-0633-9), 2015-09-02
Supplement: 13058_2015_633_MOESM1_ESM.pdf [file 13058_2015_633_MOESM1_ESM.pdf]

**Additional File 1. Treatment effects on sex hormones, adjusted for changes in fat percentage**

|                                | TER* (95% CI):              | <i>P</i> -value <sup>a</sup> | TER* (95% CI):                           | <i>P</i> -value <sup>b</sup> |
|--------------------------------|-----------------------------|------------------------------|------------------------------------------|------------------------------|
|                                | Intervention vs.<br>Control |                              | <del>Mainly e</del> Exercise vs.<br>Diet |                              |
| <b>Oestradiol (pg/mL)</b>      |                             |                              |                                          |                              |
| Diet                           | 0.96 (0.83 to 1.10)         | 0.530                        |                                          |                              |
| <del>Mainly e</del> Exercise   | 0.98 (0.83 to 1.16)         | 0.814                        | 1.03 (0.92 to 1.15)                      | 0.650                        |
| <b>Oestrone (pg/mL)</b>        |                             |                              |                                          |                              |
| Diet                           | 1.04 (0.93 to 1.16)         | 0.500                        |                                          |                              |
| <del>Mainly E</del> Exercise   | 0.99 (0.87 to 1.13)         | 0.925                        | 0.96 (0.88 to 0.96)                      | 0.320                        |
| <b>Free oestradiol (pg/mL)</b> |                             |                              |                                          |                              |
| Diet                           | 0.92 (0.79 to 1.06)         | 0.238                        |                                          |                              |

|                           |                     |       |                     |       |
|---------------------------|---------------------|-------|---------------------|-------|
| <u>Mainly Exercise</u>    | 0.94 (0.79 to 1.12) | 0.490 | 1.03 (0.92 to 1.16) | 0.631 |
| Testosterone (pg/mL)      |                     |       |                     |       |
| Diet                      | 1.01 (0.91 to 1.12) | 0.810 |                     |       |
| <u>Mainly Exercise</u>    | 0.96 (0.85 to 1.08) | 0.464 | 0.94 (0.87 to 1.02) | 0.166 |
| Androstenedione (pg/mL)   |                     |       |                     |       |
| Diet                      | 1.00 (0.85 to 1.16) | 0.949 |                     |       |
| <u>Mainly Exercise</u>    | 0.89 (0.75 to 1.06) | 0.198 | 0.90 (0.79 to 1.01) | 0.071 |
| Free testosterone (pg/mL) |                     |       |                     |       |
| Diet                      | 0.96 (0.87 to 1.07) | 0.511 |                     |       |
| <u>Mainly Exercise</u>    | 0.91 (0.81 to 1.03) | 0.150 | 0.95 (0.87 to 1.09) | 0.201 |
| SHBG (nmol/L)             |                     |       |                     |       |
| Diet                      | 1.07 (0.99 to 1.16) | 0.069 |                     |       |

|                          |                     |       |                     |       |
|--------------------------|---------------------|-------|---------------------|-------|
| <u>Mainly e</u> Exercise | 1.08 (0.99 to 1.18) | 0.070 | 1.01 (0.95 to 1.07) | 0.747 |
|--------------------------|---------------------|-------|---------------------|-------|

a. A *P*-value of <0.025 was considered significant for the comparison of both intervention groups versus control.

b. A *P*-value of <0.05 was considered significant for the comparison mainly exercise versus diet.

Complete case data of oestradiol were available for 223 women; oestrone for 221 women; free oestradiol for 222 women; testosterone and androstenedione for 229 women; free testosterone for 228 women; and SHBG for 230.

\*TER=Treatment effect ratio (95% confidence interval), which represents the overall intervention effect on hormone change (adjusted for baseline), estimated by linear regression analysis. Because the linear regression models were based on log-transformed hormone data, the presented treatment effect is the antilogarithm of the original estimate. Therefore, the TER is a ratio that indicates how many times the level in one group is higher (TER>1) or lower (TER<1) compared with a reference group. For example, TER intervention versus control = 0.9 indicates that the hormone level in the intervention group is on average 10% lower compared with the control group.
