# Supplementary material for: Effect of weight loss, with or without exercise, on body composition and sex hormones in postmenopausal women: the SHAPE-2 trial
Source: PubMed Central journal article supplement (PMC4557857; doi:10.1186/s13058-015-0633-9), 2015-09-02
Supplement: 13058_2015_633_MOESM2_ESM.pdf [file 13058_2015_633_MOESM2_ESM.pdf]

**Additional File 2. Effects on sex hormones in women who lost >2 kg body weight (intervention groups), or remained weight stable ( $\pm 2$  kg, control group)**

|                          | Baseline  | 16 weeks  | % change | TER* (95% CI):      | P-value# | TER* (95% CI):               | P-value^ |
|--------------------------|-----------|-----------|----------|---------------------|----------|------------------------------|----------|
|                          | Geometric | Geometric | 16 weeks | Intervention vs.    |          | <u>Mainly e</u> Exercise vs. |          |
|                          | mean      | mean      |          | Control             |          | Diet                         |          |
| Estradiol (pg/ml)        |           |           |          |                     |          |                              |          |
| Control                  | 3.80      | 4.00      | 5.18     |                     |          |                              |          |
| Diet                     | 4.33      | 3.69      | -14.6    | 0.85 (0.73 to 0.98) | 0.030    |                              |          |
| <u>Mainly e</u> Exercise | 3.73      | 3.23      | -13.3    | 0.82 (0.71 to 0.95) | 0.008    | 0.96 (0.86 to 1.08)          | 0.532    |
| Estrone (pg/ml)          |           |           |          |                     |          |                              |          |
| Control                  | 20.1      | 20.6      | 2.65     |                     |          |                              |          |
| Diet                     | 20.6      | 20.3      | -1.56    | 0.97 (0.87 to 1.07) | 0.507    |                              |          |
| <u>Mainly e</u> Exercise | 20.2      | 18.9      | -6.20    | 0.91 (0.82 to 1.02) | 0.095    | 0.95 (0.87 to 1.03)          | 0.192    |
| Free estradiol (pg/ml)   |           |           |          |                     |          |                              |          |
| Control                  | 0.09      | 0.10      | 4.31     |                     |          |                              |          |
| Diet                     | 0.10      | 0.08      | -19.4    | 0.79 (0.68 to 0.92) | 0.002    |                              |          |

|                              |      |      |       |                     |        |                     |       |
|------------------------------|------|------|-------|---------------------|--------|---------------------|-------|
| <u>Mainly e</u> Exercise     | 0.09 | 0.07 | -20.2 | 0.75 (0.65 to 0.88) | <0.001 | 0.95 (0.85 to 1.07) | 0.432 |
| Testosterone (pg/ml)         |      |      |       |                     |        |                     |       |
| Control                      | 193  | 189  | -2.33 |                     |        |                     |       |
| Diet                         | 198  | 190  | -4.17 | 0.99 (0.89 to 1.09) | 0.780  |                     |       |
| <u>Mainly e</u> Exercise     | 186  | 174  | -6.91 | 0.95 (0.86 to 1.04) | 0.262  | 0.96 (0.89 to 1.03) | 0.272 |
| Androstenedione<br>(pg/ml)   |      |      |       |                     |        |                     |       |
| Control                      | 582  | 554  | -4.67 |                     |        |                     |       |
| Diet                         | 567  | 538  | -5.27 | 0.98 (0.85 to 1.14) | 0.834  |                     |       |
| <u>Mainly e</u> Exercise     | 576  | 505  | -12.3 | 0.92 (0.79 to 1.06) | 0.249  | 0.93 (0.83 to 1.04) | 0.228 |
| Free testosterone<br>(pg/ml) |      |      |       |                     |        |                     |       |
| Control                      | 2.78 | 2.67 | -3.70 |                     |        |                     |       |
| Diet                         | 2.58 | 2.24 | -13.3 | 0.89 (0.80 to 0.99) | 0.024  |                     |       |
| <u>Mainly e</u> Exercise     | 2.42 | 1.99 | -17.8 | 0.83 (0.75 to 0.92) | 0.001  | 0.94 (0.87 to 1.01) | 0.108 |
| SHBG‡ (nmol/l)               |      |      |       |                     |        |                     |       |

|                          |      |      |      |                     |        |                     |       |
|--------------------------|------|------|------|---------------------|--------|---------------------|-------|
| Control                  | 42.4 | 43.2 | 1.95 |                     |        |                     |       |
| Diet                     | 50.1 | 58.2 | 16.1 | 1.16 (1.08 to 1.24) | <0.001 |                     |       |
| <u>Mainly e</u> Exercise | 50.0 | 60.4 | 20.8 | 1.20 (1.13 to 1.29) | <0.001 | 1.04 (0.99 to 1.10) | 0.128 |

Women included in this subgroup analysis:  $N=206$  (84.7% of total study population). Control,  $N=35$  (72.9% of the total control group); Diet,  $N=85$  (87.6% of the total diet group); Mainly eExercise,  $N=86$  (87.8% of the total mainly exercise group).

Complete case data of oestradiol were available for 198 women; oestrone for 196 women; free oestradiol for 197 women; testosterone and androstenedione for 204 women; free testosterone for 203 women; and SHBG for 205.

‡SHBG: Sex hormone binding globulin

# a  $P$ -value of  $<0.025$  was considered significant for the comparison of both intervention groups versus control.

^ a  $P$ -value of  $<0.05$  was considered significant for the comparison mainly exercise versus diet.

\*TER=Treatment effect ratio (95% confidence interval), which represents the overall intervention effect on hormone change (adjusted for baseline), estimated by linear regression analysis. Because the linear regression models were based on log-transformed hormone data, the presented treatment effect is the antilogarithm of the original estimate. Therefore, the TER is a ratio that indicates how many times the level in one group is higher ( $TER>1$ ) or lower ( $TER<1$ ) compared with a reference group. For example, TER intervention versus control = 0.9 indicates that the hormone level in the intervention group is on average 10% lower compared with the control group.
