# Supplementary material for: Effect of weight loss, with or without exercise, on body composition and sex hormones in postmenopausal women: the SHAPE-2 trial
Source: PubMed Central journal article supplement (PMC4557857; doi:10.1186/s13058-015-0633-9), 2015-09-02
Supplement: 13058_2015_633_MOESM3_ESM.pdf [file 13058_2015_633_MOESM3_ESM.pdf]

**Additional File 3. Effects on sex hormones in women who were adherent to the prescribed physical activity**

|                               | <b>Baseline</b> | <b>16 weeks</b>  | <b>% change</b> | <b>TER* (95% CI):</b>   | <b>P-value#</b> | <b>TER* (95% CI):</b>       | <b>P-value^</b> |
|-------------------------------|-----------------|------------------|-----------------|-------------------------|-----------------|-----------------------------|-----------------|
|                               | <b>Geometri</b> | <b>Geometric</b> | <b>16 weeks</b> | <b>Intervention vs.</b> |                 | <b>Mainly eExercise vs.</b> |                 |
|                               | <b>c mean</b>   | <b>mean</b>      |                 | <b>Control</b>          |                 | <b>Diet</b>                 |                 |
| <b>Estradiol (pg/ml)</b>      |                 |                  |                 |                         |                 |                             |                 |
| Control                       | 4.49            | 4.76             | 6.08            |                         |                 |                             |                 |
| Diet                          | 4.28            | 3.60             | -15.8           | 0.78 (0.66 to 0.91)     | 0.002           |                             |                 |
| <u>Mainly eExercise</u>       | 3.73            | 3.19             | -14.5           | 0.75 (0.64 to 0.88)     | <0.001          | 0.96 (0.85 to 1.09)         | 0.548           |
| <b>Estrone (pg/ml)</b>        |                 |                  |                 |                         |                 |                             |                 |
| Control                       | 22.9            | 24.7             | 7.83            |                         |                 |                             |                 |
| Diet                          | 20.5            | 20.1             | -1.70           | 0.88 (0.79 to 0.98)     | 0.022           |                             |                 |
| <u>Mainly eExercise</u>       | 19.9            | 18.5             | -7.18           | 0.82 (0.74 to 0.92)     | 0.001           | 0.94 (0.86 to 1.02)         | 0.134           |
| <b>Free estradiol (pg/ml)</b> |                 |                  |                 |                         |                 |                             |                 |
| Control                       | 0.11            | 0.12             | 6.54            |                         |                 |                             |                 |
| Diet                          | 0.10            | 0.08             | -19.1           | 0.74 (0.62 to 0.87)     | <0.001          |                             |                 |
| <u>Mainly eExercise</u>       | 0.09            | 0.07             | -21.4           | 0.69 (0.58 to 0.81)     | <0.001          | 0.93 (0.82 to 1.06)         | 0.294           |

| Testosterone (pg/ml)      |      |      |       |                     |        |                     |       |
|---------------------------|------|------|-------|---------------------|--------|---------------------|-------|
| Control                   | 211  | 208  | -1.31 |                     |        |                     |       |
| Diet                      | 200  | 184  | -7.56 | 0.93 (0.84 to 1.02) | 0.132  |                     |       |
| <u>Mainly e</u> Exercise  | 184  | 171  | -7.01 | 0.91 (0.83 to 1.01) | 0.083  | 0.99 (0.91 to 1.07) | 0.775 |
| Androstenedione (pg/ml)   |      |      |       |                     |        |                     |       |
| Control                   | 654  | 658  | 0.53  |                     |        |                     |       |
| Diet                      | 596  | 536  | -10.1 | 0.86 (0.73 to 1.01) | 0.063  |                     |       |
| Exercise                  | 563  | 495  | -12.0 | 0.82 (0.70 to 0.96) | 0.016  | 0.96 (0.85 to 1.08) | 0.473 |
| Free testosterone (pg/ml) |      |      |       |                     |        |                     |       |
| Control                   | 3.05 | 3.03 | -0.65 |                     |        |                     |       |
| Diet                      | 2.64 | 2.27 | -13.8 | 0.85 (0.76 to 0.95) | 0.003  |                     |       |
| <u>Mainly e</u> Exercise  | 2.40 | 1.96 | -18.3 | 0.79 (0.71 to 0.88) | <0.001 | 0.93 (0.86 to 1.02) | 0.114 |
| SHBG‡ (nmol/l)            |      |      |       |                     |        |                     |       |
| Control                   | 42.1 | 41.7 | -0.94 |                     |        |                     |       |
| Diet                      | 48.3 | 53.5 | 10.7  | 1.14 (1.05 to 1.24) | 0.003  |                     |       |
| <u>Mainly e</u> Exercise  | 49.8 | 60.6 | 21.8  | 1.26 (1.16 to 1.37) | <0.001 | 1.10 (1.03 to 1.18) | 0.003 |

Note. Adherence is defined as: for the mainly exercise group, >80% attendance of all exercise classes. For the diet and control group, <60 minutes per week increase in moderate to vigorous activities ( $\geq 4$ MET) based on the SQUASH questionnaire (questions on sports, or transportation, i.e. cycling moderate and high intensity/walking high intensity, or if missing, the Actigraph activity monitor).

Women included in this subgroup analysis:  $N=168$  (69.1% of the total study population). Control,  $n=30$  (62.5% of the total control group); Diet,  $N=67$  (69.1% of the total diet group); Mainly eExercise,  $N=71$  (72.4% of the total mainly exercise group).

Complete case data of oestradiol were available for 164 women; oestrone for 161 women; free oestradiol for 163 women; testosterone and androstenedione for 168 women; free testosterone and SHBG for 167 women.

‡SHBG: Sex hormone binding globulin

# a  $P$ -value of  $<0.025$  was considered significant for the comparison of both intervention groups versus control.

^ a  $P$ -value of  $<0.05$  was considered significant for the comparison mainly exercise versus diet.

\*TER=Treatment effect ratio (95% confidence interval), which represents the overall intervention effect on hormone change (adjusted for baseline), estimated by linear regression analysis. Because the linear regression models were based on log-transformed hormone data, the presented treatment effect is the antilogarithm of the original estimate. Therefore, the TER is a ratio that indicates how many times the level in one group is higher ( $TER>1$ ) or lower ( $TER<1$ ) compared with a reference group. For example, TER intervention versus control = 0.9 indicates that the hormone level in the intervention group is on average 10% lower compared with the control group.
